# Supplementary material for: Preliminary Study on the Formation Mechanism of Malformed Sweet Cherry (Prunus avium L.) Fruits in Southern China Using Transcriptome and Metabolome Data
Source: MDPI journal article supplement (doi:10.3390/ijms25010153), 2023-12-21
Supplement: s1 [file s1]

**Table S1.** Transcriptome data of gibberellin-related enzymes

| Gene Name      | Gene ID      | CK1   | CK2   | CK3   | T1    | T2    | T3    |
|----------------|--------------|-------|-------|-------|-------|-------|-------|
| <i>GA20ox1</i> | LOC110745003 | 1.58  | 1.97  | 2.66  | 5.44  | 4.01  | 5.84  |
| <i>GA20ox2</i> | LOC110762932 | 1.65  | 2.06  | 1.51  | 4.27  | 4.16  | 5.28  |
| <i>GA20ox3</i> | LOC110762934 | 3.54  | 3.14  | 2.83  | 4.92  | 7.42  | 5.22  |
| <i>GA20ox4</i> | LOC110765963 | 4.31  | 4.67  | 4.71  | 7.13  | 10.25 | 8.96  |
| <i>GA20ox5</i> | LOC110765965 | 28.71 | 49.51 | 37.59 | 56.94 | 46.45 | 61.13 |
| <i>GA2ox1</i>  | LOC110754555 | 2.13  | 3.41  | 2.77  | 4.69  | 4.79  | 4.89  |
| <i>GA2ox2</i>  | LOC110772934 | 18.79 | 8.72  | 10.69 | 46.20 | 46.69 | 59.32 |
| <i>GA2ox3</i>  | LOC110773997 | 5.01  | 6.25  | 3.12  | 0.12  | 0.75  | 0.40  |
| <i>GA3ox</i>   | LOC110750486 | 3.27  | 2.29  | 5.55  | 30.77 | 9.26  | 20.02 |

**Table S2.** Specific primers pairs for selected genes used in qRT-PCR.

| Primers name     | Sequences (5'-3')         | Base (bp) |
|------------------|---------------------------|-----------|
| <i>GA20ox1-F</i> | CTCCATTCTTTGAAAGCCTCA     | 21        |
| <i>GA20ox1-R</i> | GATCTTCACGATTTTCTTCGATAAT | 25        |
| <i>GA20ox2-F</i> | CCTCATTTTCATAGCCTCTCCATT  | 23        |
| <i>GA20ox2-R</i> | AAGCTCATCAGCGTGATCTTCAC   | 23        |
| <i>GA20ox3-F</i> | AGGAGGTGTTTGATTTCGTAGC    | 22        |
| <i>GA20ox3-R</i> | GGATTCTCAGGCCATTGGTT      | 20        |
| <i>GA20ox4-F</i> | CCCTGATCCTGAGGACAAAG      | 20        |
| <i>GA20ox4-R</i> | CAAGGCTATAAGTCCCATCAACT   | 23        |
| <i>GA20ox5-F</i> | GGAGGAGCTACTGAGTGATGTAA   | 23        |
| <i>GA20ox5-R</i> | GATGTTCTCCACCTCTTGTTTC    | 22        |
| <i>GA2ox1-F</i>  | GAAGTGAATGGCTGAAGGATTAA   | 22        |
| <i>GA2ox1-R</i>  | GCTCTGGACATGGTGGGTTAG     | 20        |
| <i>GA2ox2-F</i>  | GTTCAAGAGCGTGAGGCATAG     | 21        |
| <i>GA2ox2-R</i>  | CCATAAGTGACGGCAGAGGT      | 20        |
| <i>GA2ox3-F</i>  | TCACAATCACAGCTCGTATTCA    | 22        |
| <i>GA2ox3-R</i>  | CAGTGGGTGGCTTTTCGTCTA     | 20        |
| <i>GA3ox-F</i>   | AATGGGTGGAGGTGATGGTC      | 20        |
| <i>GA3ox-R</i>   | CAGCAAAGTTGAATGGCTTGTA    | 22        |
| <i>β-ACTIN-F</i> | CCAGGGCTGTGTTTCCTTCTA     | 21        |
| <i>β-ACTIN-R</i> | ATGATCTGCGTCATCTTTTCT     | 21        |
