# Supplementary material for: Preliminary Study on the Formation Mechanism of Malformed Sweet Cherry (Prunus avium L.) Fruits in Southern China Using Transcriptome and Metabolome Data
Source: MDPI journal article supplement (doi:10.3390/ijms25010153), 2023-12-21
Supplement: s1 [file s1]

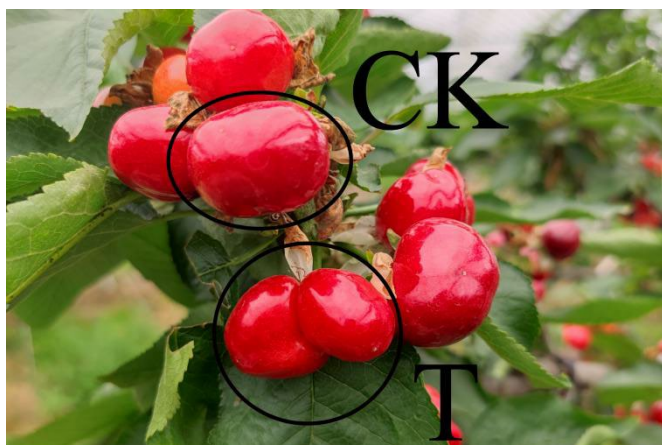

**Figure S1.** Normal fruit (CK) and Malformed fruit (T) of sweet cherry was selected as the experimental material.

## Supplementary Figure 2

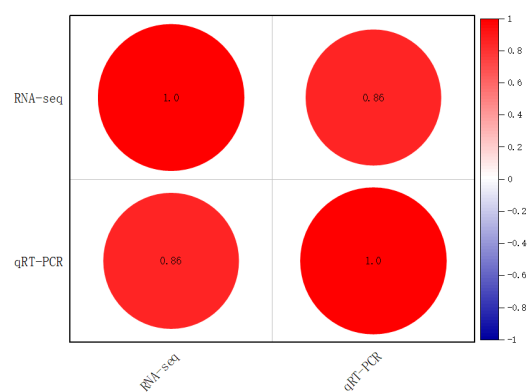

**Figure S2.** Correlation analysis of RNA-seq data and qRT-PCR in sweet cherry fruit.
